# Supplementary material for: PISA printing from CTA functionalized polymer scaffolds
Source: Royal Society of Chemistry journal article supplement (doi:10.1039/d3lp00252g), 2024-01-01
Supplement: d3lp00252g1.pdf [file d3lp00252g1.pdf]

## Supplementary Information

### PISA printing from CTA functionalized polymer scaffolds

A. Priester<sup>a</sup>, J. Yeng<sup>a</sup>, Y. Zhang<sup>b</sup>, R. Wang<sup>b</sup>, A. J. Convertine<sup>\*a</sup>

<sup>a</sup>Materials Science and Engineering Department, Missouri University of Science and Technology, Rolla, MO 65409

<sup>b</sup>Department of Chemistry, Missouri University of Science and Technology, Rolla, MO 65409

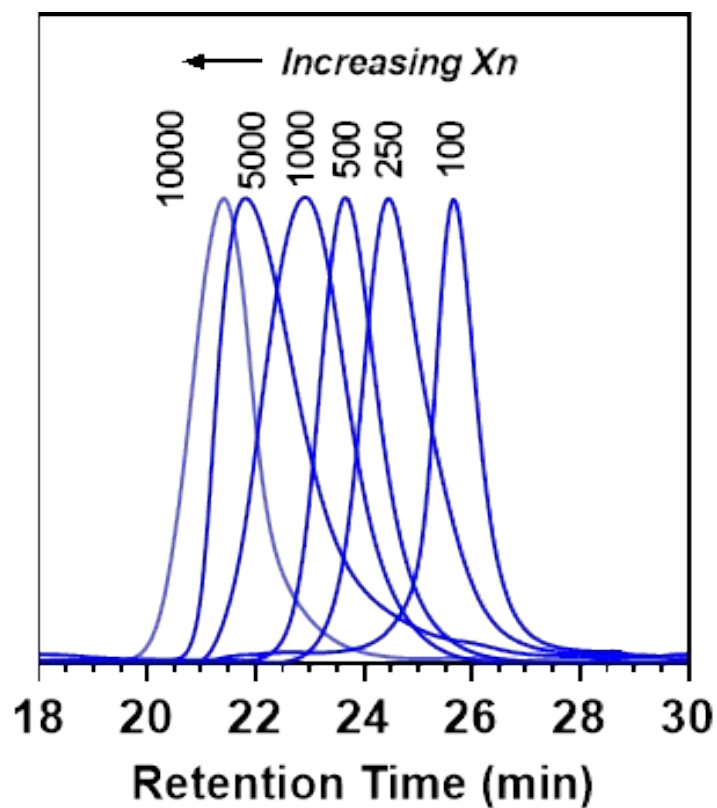

SI Figure 1. GPC traces for PET RAFT poly(DMA-co-HEAm) polymers targeting various DPs

**SI Table I.** Summarized molecular weights and PDI (molar mass dispersity) values for additional varying poly(DMA-co-HEAm) target DPs

| Degree of Polymerization ( $X_n$ ) | Conversion (%) | $M_{n,theo}$ (Da) | $M_{n,GPC}$ (Da) | Molar Mass Dispersity ( $\bar{D}$ ) |
|------------------------------------|----------------|-------------------|------------------|-------------------------------------|
| 100                                | 99+            | 9913              | 8352             | 1.22                                |
| 250                                | 99+            | 24783             | 19663            | 1.40                                |
| 1000                               | 99+            | 99130             | 93092            | 1.45                                |
| 5000                               | 95+            | 495650            | 349782           | 1.54                                |

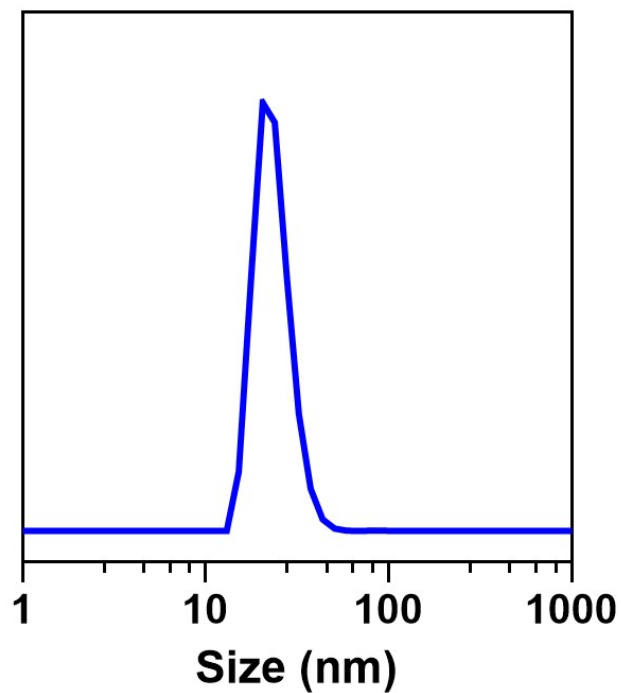

**SI Figure 2.** DLS for LFP or 10% BTP-grafted poly(DMA-co-HEAm) macro-CTA

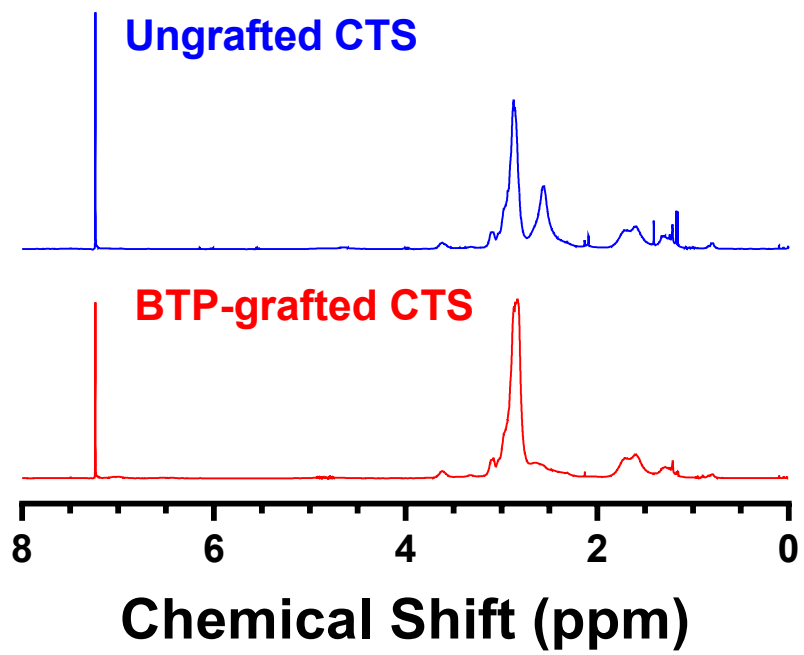

SI Figure 3. <sup>1</sup>H NMR traces for purified ungrafted and grafted DP10000 CTS scaffolds

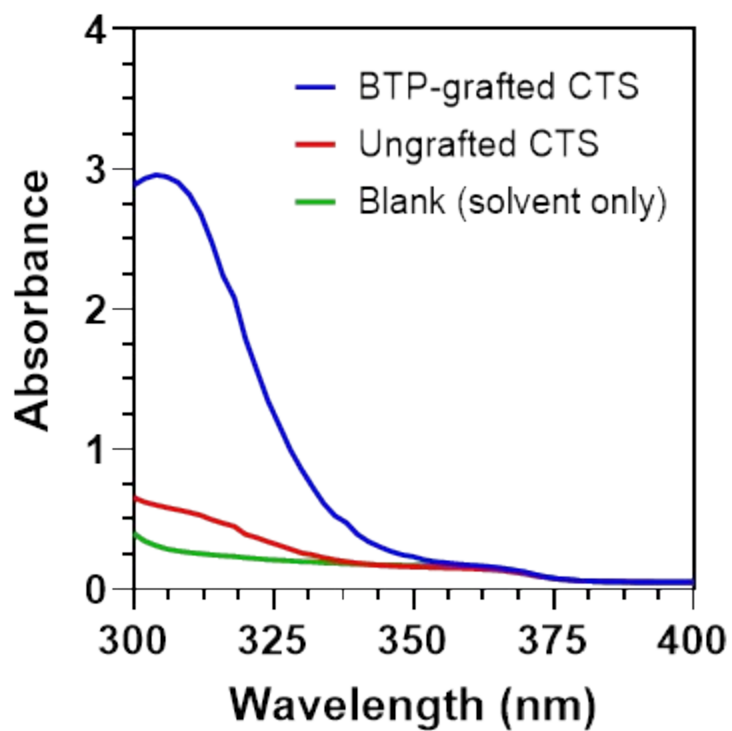

**SI Figure 4.** UV-Vis spectra for BTP-grafted and ungrafted CTS scaffolds compared to a solvent-only blank (91% isopropanol). The absorbance value at 325 nm was used to determine the CTA concentration per gram of polymer via a BTP standard curve in 91% isopropanol. Since there is a slight difference in absorbance between the ungrafted CTS sample and blank at this wavelength, this absorbance was taken into account when determining BTP concentration

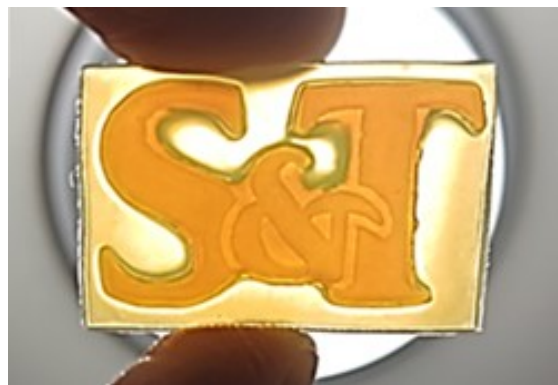

**SI Figure 5.** Overcured S&T logo printed with DP 10000 CFS

**SI Table II.** Mechanical property values for 10% DCT-grafted LFP HPMA PISA resin system (DP 250 HPMA, 25 wt. % solids)

| <b>Elastic Modulus,<br/>E (kPa)</b> | <b>Strain-to-break,<br/><math>\epsilon_{br}</math> (%)</b> | <b>Toughness,<br/>K (kJ/m<sup>3</sup>)</b> |
|-------------------------------------|------------------------------------------------------------|--------------------------------------------|
| 6.37 ± 0.871                        | 953 ± 69.5                                                 | 224 ± 64.3                                 |

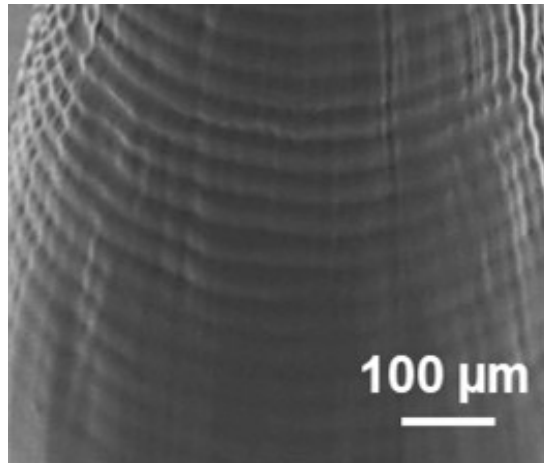

**SI Figure 6.** SEM images of layers on a part 3D-printed using 10% BTP CFS with DP 500 DAAM at 30 wt. %. This SEM sample is representative for the CFS PISA system specifically.

**Table III.** Mechanical property summary for crosslinked version DP 10000 10% grafted CFS with target DP 500 DAAM at 25 wt. % solids. This system contained 2.5 wt. % MBAC (N’N-methylene bisacrylamide) crosslinker.

| <b>Elastic Modulus<br/>(kPa)</b> | <b>Strain-to-break, <math>\epsilon</math><br/>(%)</b> | <b>Toughness, K<br/>(kJ/m<sup>3</sup>)</b> |
|----------------------------------|-------------------------------------------------------|--------------------------------------------|
| 176 ± 35                         | 96 ± 22                                               | 60 ± 14                                    |
